# Supplementary material
Source: PubMed Central journal article supplement (PMC6555650)
Supplement: NIHMS1524523-supplement-1.pdf [file NIHMS1524523-supplement-1.pdf]

E supplement

**eTable I. Secondary outcomes for exposure to *Alternaria* in sensitized and not sensitized asthmatic children.**

---

|                                 | <u>Sensitized to <i>Alternaria</i></u> |               | <u>Not Sensitized to <i>Alternaria</i></u> |                |
|---------------------------------|----------------------------------------|---------------|--------------------------------------------|----------------|
|                                 | <u>Coefficient</u>                     | <u>95% CI</u> | <u>Coefficient</u>                         | <u>95% CI</u>  |
| <b><u><i>Alternaria</i></u></b> |                                        |               |                                            |                |
| Missed school days              | IRR=1.94                               | (0.88, 4.26)  | IRR=1.04                                   | (0.66, 1.66)   |
| Healthcare utilization          | IRR=2.04                               | (0.32, 12.97) | IRR=1.28                                   | (0.72, 2.26)   |
| Caregiver changed plans         | OR=0.56                                | (0.12, 2.54)  | OR=1.04                                    | (0.53, 1.63)   |
| Caregiver lost sleep            | OR=3.05                                | (0.98, 9.51)  | OR=0.91                                    | (0.60, 1.40)   |
| FEV1 % predicted                | $\beta$ =-20.6                         | (-57.9, 16.7) | $\beta$ =-7.7                              | (-35.5, 20.19) |

---

Adjusted for age, sex, race, season, and classroom endotoxin levels.

Definition of abbreviates: CI = Confidence Interval

IRR = Incidence rate ratio

OR = Odds ratio

$\beta$  = Beta coefficient
